# Supplementary material for: Evaluation of Saliva Stability for NMR Metabolomics: Collection and Handling Protocols
Source: PubMed Central journal article supplement (PMC7766053; doi:10.3390/metabo10120515), 2020-12-19
Supplement: metabolites-10-00515-s001.pdf [file metabolites-10-00515-s001.pdf]

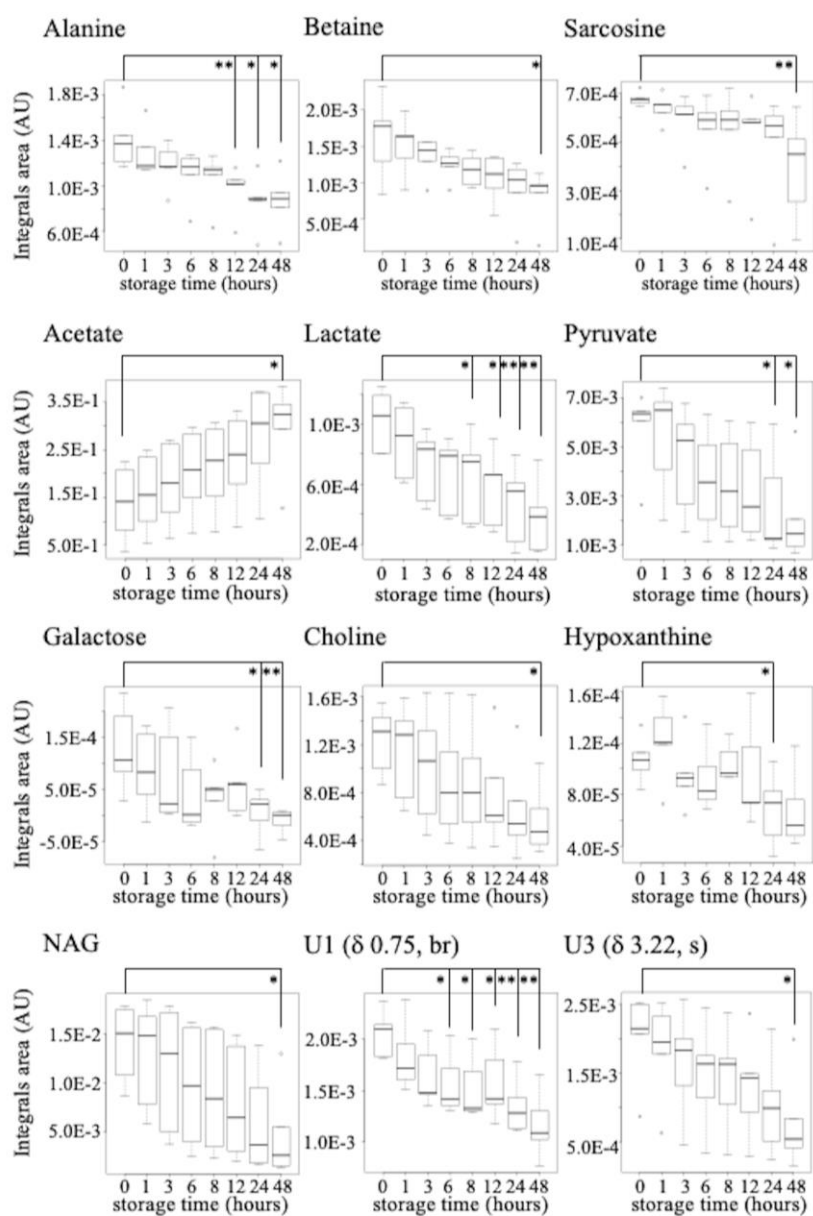

**Figure S1.** Boxplots showing the main metabolites varying in saliva (post-collection) at 22°C, up to 48h.

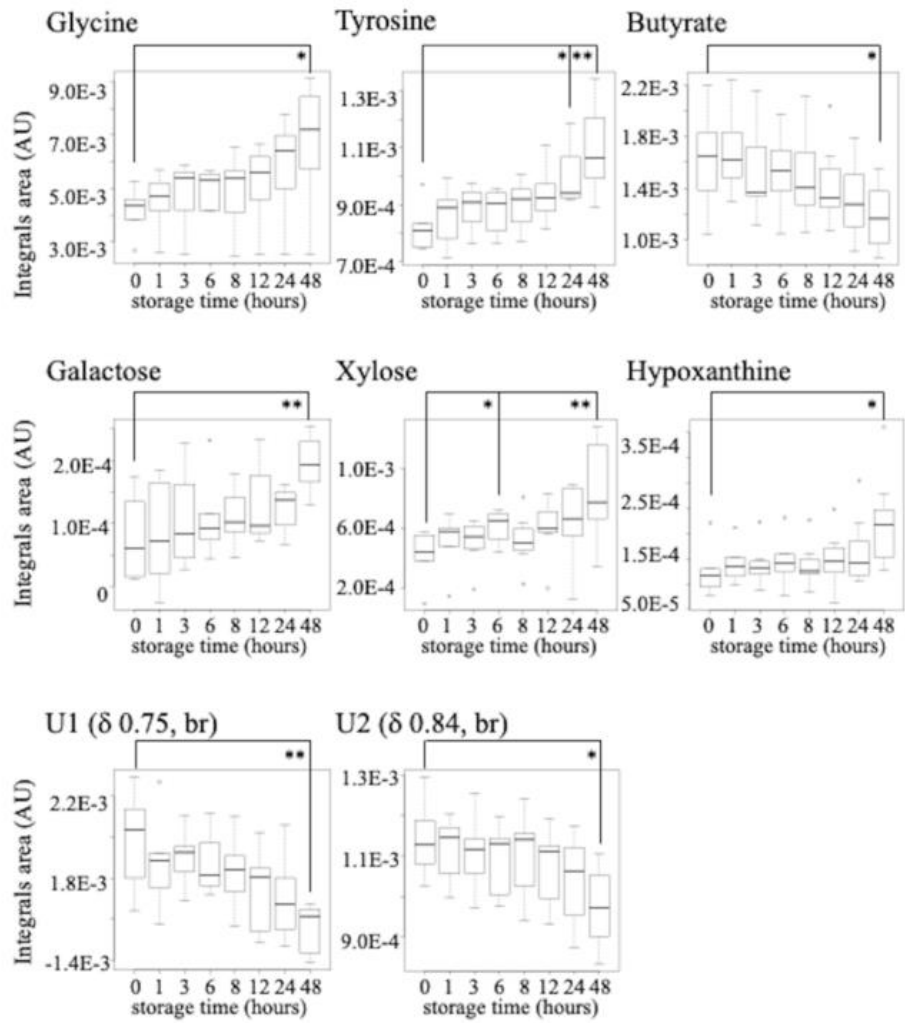

**Figure S2.** Boxplots showing the main metabolites varying in saliva (post-collection) at 4°C, up to 48h.

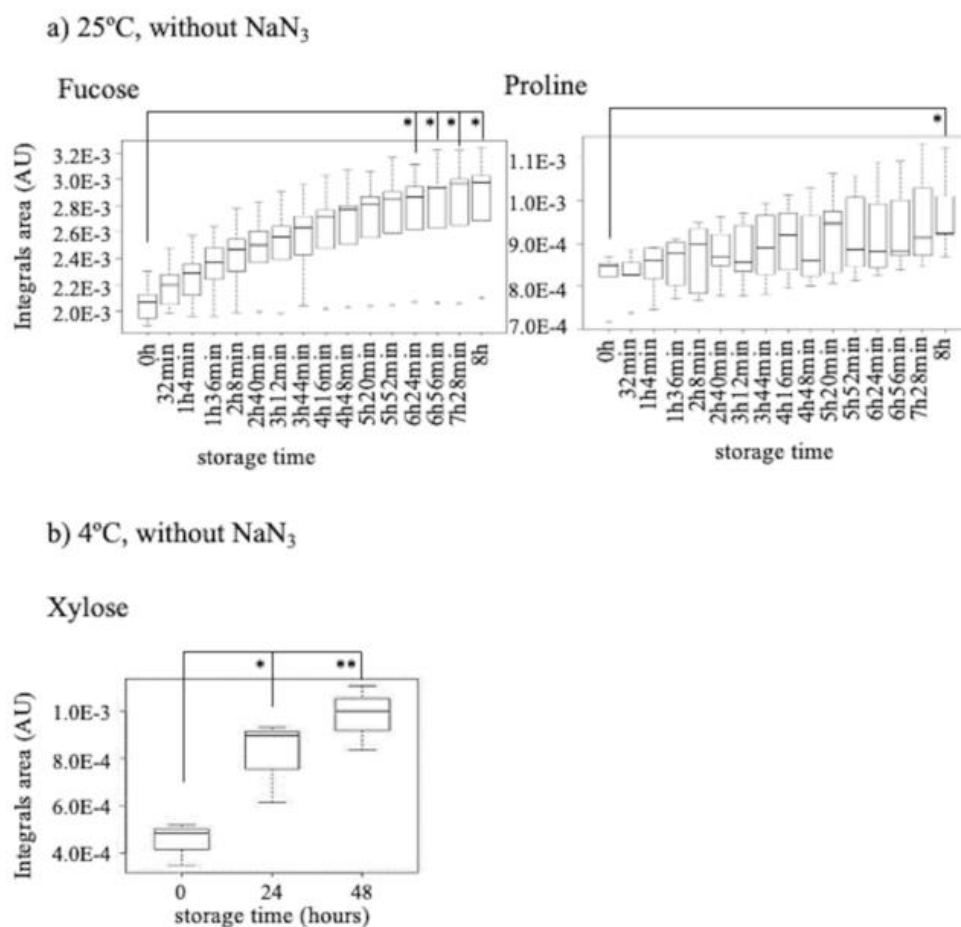

**Figure S3.** Boxplots of metabolite variations noted post-preparation, in the absence of sodium azide and at 25°C.

**Table S1.** Peak assignments in the <sup>1</sup>H NMR spectrum of saliva of healthy adult female subjects. s: singlet, d: doublet, t: triplet, q: quartet, dd: doublet of doublets, m: multiplet, br: broad signal. SCFA, short chain fatty acids; <sup>a,b,c,d</sup> compounds previously reported in NMR studies of unstimulated saliva of healthy adults in references [38] to [41], respectively; <sup>e</sup> compound detected by NMR in saliva of children [12]. *U<sub>i</sub>*: unassigned resonances *i*, for which significant variations were noted at least in one of the conditions considered. HMDB ID: compound ID number according to the Human Metabolome Database [62].

| Metabolite                       | HMDB ID     | δ <sub>H</sub> ppm (multiplicity)                             |
|----------------------------------|-------------|---------------------------------------------------------------|
| <i>Amino acids</i>               |             |                                                               |
| alanine <sup>a, b, c</sup>       | HMDB0000161 | 1.48 (d), 3.76 (q)                                            |
| aspartate <sup>a, c</sup>        | HMDB0000191 | 2.69 (dd), 2.83 (dd), 3.90 (dd)                               |
| glycine <sup>a, b, c</sup>       | HMDB0000123 | 3.56 (s)                                                      |
| glutamate <sup>a, c</sup>        | HMDB0003339 | 2.04 (m), 2.11 (m), 2.34 (m), 3.74 (dd)                       |
| glutamine <sup>a, c</sup>        | HMDB0000641 | 2.12 (m), 2.44 (m), 3.76 (t)                                  |
| histidine <sup>a, b, c</sup>     | HMDB0000177 | 3.02 (m), 3.15 (s), 7.05 (s), 7.75 (s)                        |
| isoleucine <sup>a, c</sup>       | HMDB0000172 | 0.92 (t), 0.99 (d), 1.24 (m), 1.45 (m), 1.96 (m), 3.66 (d)    |
| leucine <sup>a, b, c</sup>       | HMDB0000687 | 0.94 (t), 1.7 (m), 3.72 (m)                                   |
| lysine <sup>a, c</sup>           | HMDB0000182 | 1.46 (m), 1.71 (m), 1.89 (m), 3.02 (t), 3.74 (t)              |
| phenylalanine <sup>a, b, c</sup> | HMDB0000159 | 3.19 (m), 3.98 (dd), 7.32 (d), 7.36 (m), 7.42 (m)             |
| proline <sup>a, c</sup>          | HMDB0000162 | 1.99 (m), 2.06 (m), 2.35 (m), 3.33 (dt), 3.41 (dt), 4.16 (dd) |
| sarcosine <sup>a, b, c</sup>     | HMDB0000271 | 2.74 (s), 3.60 (s)                                            |
| taurine <sup>a, b, c</sup>       | HMDB0000251 | 3.27 (t), 3.42 (t)                                            |
| threonine <sup>a, c</sup>        | HMDB0000167 | 1.32 (d), 3.57 (d), 4.26 (m)                                  |

|                                             |             |                                                                                                       |
|---------------------------------------------|-------------|-------------------------------------------------------------------------------------------------------|
| tyrosine <sup>a, b, c</sup>                 | HMDB0000158 | 3.06 (dd), 3.12 (dd), 3.95 (dd), 6.90 (d), 7.20 (d)                                                   |
| valine <sup>a, c</sup>                      | HMDB0000883 | 0.99 (d), 1.05 (d)                                                                                    |
| <b>SCFA</b>                                 |             |                                                                                                       |
| acetate <sup>a, b, c</sup>                  | HMDB0000042 | 1.92 (s)                                                                                              |
| butyrate <sup>a, c</sup>                    | HMDB0000039 | 0.89 (t), 1.56 (m), 2.14 (t)                                                                          |
| formate <sup>a, b, c</sup>                  | HMDB0000142 | 8.46 (s)                                                                                              |
| propionate <sup>a, b, c</sup>               | HMDB0000237 | 1.06 (t), 2.18 (q)                                                                                    |
| <b>Organic acids</b>                        |             |                                                                                                       |
| 4-hydroxyphenyllactate <sup>c</sup>         | HMDB0000755 | 2.87 (dd), 3.04 (dd), 4.35 (dd), 6.85 (d), 7.17 (d)                                                   |
| 5-aminopentanoate <sup>c</sup>              | HMDB0003355 | 1.65 (m), 2.23 (t), 3.00 (t)                                                                          |
| ascorbate <sup>a</sup>                      | HMDB0000044 | 3.76 (m); 4.01 (m); 4.52 (d)                                                                          |
| lactate <sup>a, b, c</sup>                  | HMDB0000190 | 1.32 (d), 4.11 (q)                                                                                    |
| pyruvate <sup>a, b, c</sup>                 | HMDB0000243 | 2.38 (s)                                                                                              |
| succinate <sup>a, c</sup>                   | HMDB0000254 | 2.41 (s)                                                                                              |
| <b>Carbohydrates</b>                        |             |                                                                                                       |
| $\alpha$ -fucose <sup>c</sup>               |             | 1.21 (d), 1.25 (d), 3.45 (dd), 3.64 (dd), 3.79 (m), 4.56 (d)                                          |
| $\alpha$ -galactose <sup>a, c</sup>         | HMDB0000143 | 3.48 (dd), 3.64 (dd), 3.72 (m), 3.82 (m), 3.92 (d), 3.96 (d), 4.07 (t), 5.27 (d)                      |
| $\alpha$ -glucose <sup>a, b, c</sup>        | HMDB0000122 | 3.23 (dd), 3.39 (m), 3.45 (m), 3.52 (dd), 3.72 (m), 3.82 (m), 3.88 (dd), 4.63 (d), 5.23 (d)           |
| sucrose <sup>b, c</sup>                     | HMDB0000258 | 3.46 (t), 3.55 (dd), 3.67 (s), 3.75 (t), 3.82 (m), 3.87 (dd), 3.89 (dd), 4.04 (t), 4.21 (d), 5.42 (d) |
| xylose <sup>e</sup>                         | HMDB0000098 | 3.23 (dd), 3.33 (dd), 3.42 (t), 3.53 (dd), 3.63 (m), 3.93 (dd), 4.58 (d), 5.21 (d)                    |
| <b>Amines</b>                               |             |                                                                                                       |
| dimethylamine <sup>a, c</sup>               | HMDB0000087 | 2.73 (s)                                                                                              |
| hypoxanthine <sup>a, c</sup>                | HMDB0000157 | 8.19 (s), 8.20 (s)                                                                                    |
| methylamine <sup>a, c</sup>                 | HMDB0000164 | 2.61 (s)                                                                                              |
| trimethylamine <sup>a, c</sup>              | HMDB0000906 | 2.89 (s)                                                                                              |
| <b>Other compounds</b>                      |             |                                                                                                       |
| acetone <sup>a, b, c</sup>                  | HMDB0001659 | 2.23 (s)                                                                                              |
| acetoin <sup>d</sup>                        | HMDB0003243 | 1.39 (d)                                                                                              |
| allantoin <sup>a</sup>                      | HMDB0000462 | 5.39 (s)                                                                                              |
| choline <sup>a, c</sup>                     | HMDB0000097 | 3.20 (s), 3.52 (m), 4.07 (m)                                                                          |
| dimethyl sulfone <sup>c</sup>               | HMDB0004983 | 3.15 (s)                                                                                              |
| ethanol <sup>a, b, c</sup>                  | HMDB0000108 | 1.19 (t), 3.65 (q)                                                                                    |
| methanol <sup>a, b, c</sup>                 | HMDB0001875 | 3.36 (s)                                                                                              |
| methylguanidine <sup>a, c</sup>             | HMDB0001522 | 2.83 (s), 3.36 (s)                                                                                    |
| <i>N</i> -acetyl-glycoproteins <sup>a</sup> |             | 2.06 (s)                                                                                              |
| propylene glycol <sup>b, c</sup>            | HMDB0001881 | 1.15 (d), 3.43 (dd), 3.53 (dd), 3.87 (m)                                                              |
| <u>putrescine</u>                           | HMDB0001414 | 3.04 (m), 1.76 (m)                                                                                    |
| uracil <sup>c</sup>                         | HMDB0000300 | 5.79 (d), 7.52 (d)                                                                                    |
| urea <sup>b, c</sup>                        | HMDB0000294 | 5.78 (br)                                                                                             |
| <b>Unassigned resonances</b>                |             |                                                                                                       |
| U1                                          |             | 0.75 (br)                                                                                             |
| U2                                          |             | 0.84 (s)                                                                                              |
| U3                                          |             | 3.22 (s)                                                                                              |
